# Supplementary material
Source: Springer Nature journal article supplement (https://www.springermedizin.de/resource/supplementary/12984_2012_517_MOESM3_ESM.pdf/9604766)

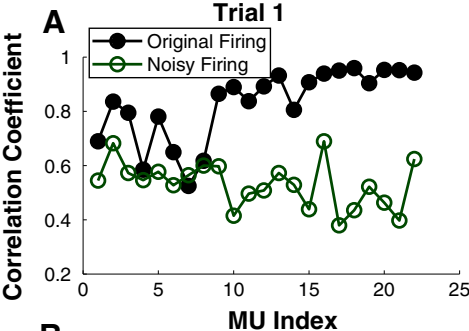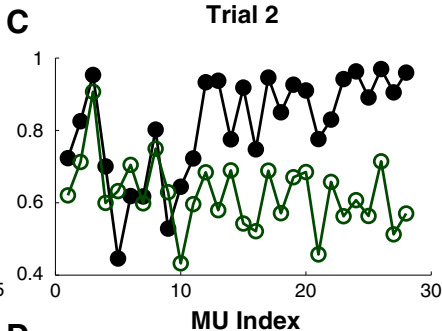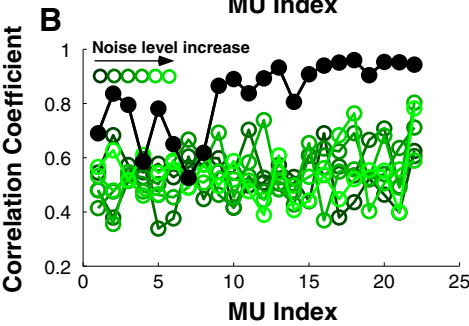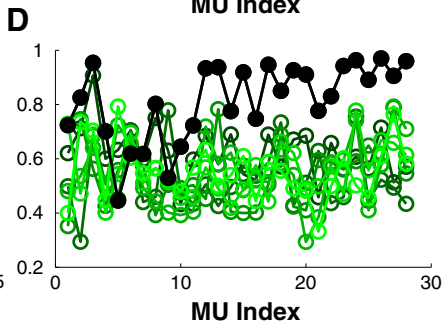

Supplement: MOESM3 [file 9604766]
